# Supplementary material
Source: PubMed Central journal article supplement (PMC7448597)
Supplement: advancesADV2020001904-suppl1.pdf [file advancesADV2020001904-suppl1.pdf]

## **Supplemental Data**

“Prognostic Impact of the ELN 2017 Risk classification in AML Patients  
Receiving Allogeneic Transplantation”

Grimm *et al.*

## Content

|                                                             |    |
|-------------------------------------------------------------|----|
| Supplemental Methods.....                                   | 3  |
| Patients and Treatment Protocols.....                       | 3  |
| Allogeneic Hematopoietic Stem Cell Transplantation.....     | 3  |
| Prevention of Graft vs Host Disease.....                    | 4  |
| Statistical Analyses.....                                   | 4  |
| Definition of Clinical Endpoints.....                       | 5  |
| Multivariate Analyses.....                                  | 5  |
| <i>EVI1</i> expression.....                                 | 6  |
| Supplemental Results.....                                   | 7  |
| Survival Entire Cohort and Distinct Subgroups.....          | 7  |
| Outcome Analysis for Patients with Monosomal Karyotype..... | 7  |
| References.....                                             | 8  |
| Supplemental Tables.....                                    | 10 |
| Table S1.....                                               | 10 |
| Table S2.....                                               | 11 |
| Table S3.....                                               | 12 |
| Supplemental Figures.....                                   | 13 |
| Supplemental Figure S1.....                                 | 13 |
| Supplemental Figure S2.....                                 | 14 |
| Supplemental Figure S3.....                                 | 15 |
| Supplemental Figure S4.....                                 | 16 |
| Supplemental Figure S5.....                                 | 17 |
| Supplemental Figure S6.....                                 | 18 |
| Supplemental Figure S7.....                                 | 19 |

## **Supplemental Methods**

### Patients and Treatment Protocols

In the subgroup of AML patients at the age of 60 years or younger patients received induction therapy according to the AML 2002 study (#061, ClinicalTrials.gov Identifier: NCT01414231),<sup>1</sup> or within the PKC412 protocol (ClinicalTrials.gov Identifier: NCT00111345)<sup>2</sup>, as part of the QuANTUM-First trial (ClinicalTrials.gov Identifier: NCT02668653) or sequential azacytidine and intensive induction chemotherapy. One patient was diagnosed with AML as a child and received treatment within the AML BFM-2014 study.<sup>3</sup>

Patients older than 60 years were treated according to the AML 2004 protocol (#069, ClinicalTrials.gov Identifier: NCT01497002),<sup>4</sup> or the OSHO #083 protocol, or received sequential azacitidine and intensive induction chemotherapy. One patient was treated with CPX-351.<sup>5</sup>

### Allogeneic Hematopoietic Stem Cell Transplantation

For consolidation therapy, all patients received an allogeneic hematopoietic stem cell transplantation (HSCT) at the University of Leipzig. All patients received granulocyte colony stimulating factor-mobilized peripheral blood stem cells on day 0. The majority of patients (n=162; 71.1%) received non-myeloablative peripheral blood HSCT with 3x30 mg/qm Fludarabine and 2 Gy (two patients received 3 Gy) total body irradiation (TBI).<sup>6,7</sup> Another 49 patients (21.5%) were treated according to a myeloablative conditioning protocol (MAC; 2x60 mg/kg body weight (BW) cyclophosphamide and 12 Gy TBI).<sup>8</sup> Four patients received reduced intensity conditioning within the MC-FludT.14/L trial (EudraCT Number 2008-002356-18). Patient who did not achieve complete remission (CR) or CR with incomplete peripheral recovery (CRi) prior to allogeneic HSCT received sequential conditioning regimens.<sup>9-11</sup>

Reasons for non-myeloablative conditioning were age (patients >50 years if receiving unrelated HSCT, and patients >55 years if receiving related HSCT), acute infection (n=4), reduced renal function (n=1) and previous autologous HSCT (n=4).

### Prevention of Graft vs Host Disease

Prevention of graft-versus-host disease (GvHD) was different according to the conditioning regimes used. All patients receiving MAC or NMA conditioning were treated with cyclosporine A (CyA), starting intravenously with 5 mg/kg BW in two daily doses from day -1. Blood levels of CyA were measured from day 0 and doses were adjusted for target levels of 200 ng/ml. Patients also received methotrexate (MTX) 15 mg intravenously on days +1, +3, +6 and +11 after transplantation. Patients with an unrelated donor additionally received in vivo T-cell depletion with thymoglobulin 2 mg/kg BW per day on days -3 to -1.

The patients receiving a reduced-intensity conditioning were treated with CyA, starting intravenously with 5 mg/kg BW in two daily doses from day -1. Blood levels of CyA were measured from day 0 and doses were adjusted for target levels of 120 - 200 ng/ml. The patients also received MTX (15 mg/m<sup>2</sup>: day +1; 10 mg/m<sup>2</sup>: days +3, +6, +11) with leukovorine.

Additionally, patients received mycophenolate mofetil (MMF) 3 g per day in three daily doses if receiving unrelated or 2 g per day in two daily doses if receiving related transplantation. CyA was reduced starting on day +84 or day +180 following related or unrelated transplantation, respectively, and MMF was stopped at day +28 following related and tapered from days +40 to +96 following unrelated transplantation.<sup>12</sup>

For all patients, immunosuppression was prolonged or extended with systemic steroids in cases of GvHD (grade >2 according to Glucksberg grading system)<sup>13</sup> or rapidly reduced in patients who relapsed (≥5% blasts in bone marrow).

### Statistical Analyses

Associations of the assignment to the three ELN2017 risk groups with baseline clinical, demographic, and molecular features were compared using the Kruskal-Wallis test and Fisher's exact test for continuous and categorical variables, respectively.

Cumulative incidence of relapse (CIR) was calculated considering the competing risk (non-relapse mortality) using the Fine and Gray model. For CIR analyses patients with only partial remission (PR) were excluded.

Overall survival (OS) was determined from date of HSCT until death from any cause. Time-to-event analysis was then calculated using the Kaplan-Meier method and groups were compared with the log-rank test.

### Definition of Clinical Endpoints

Complete remission (CR) was defined as bone marrow blasts <5%, absence of circulating blasts and blasts with Auer rods, absence of extramedullary disease, absolute neutrophils  $\geq 1.0 \times 10^9/L$ ; platelet count  $\geq 100 \times 10^9/L$ .<sup>14</sup> CRi was defined as all CR criteria except for residual neutropenia ( $< 1.0 \times 10^9/L$ ) or thrombocytopenia ( $< 100 \times 10^9/L$ ).<sup>14</sup> PR was defined as decrease of bone marrow blasts to 5% to 25% and a decrease of blast percentage of at least 50% compared to pre-treatment bone marrow.<sup>14</sup>

### Multivariate Analyses

We constructed multivariate proportional hazard models for CIR and OS to evaluate the impact of the allocation to the three ELN2017 risk groups by forward adjusting for other variables.<sup>15</sup> In addition to the ELN2017 risk classification the following variables were considered for multivariate analyses: hemoglobin at diagnosis, platelet count at diagnosis, white blood count at diagnosis, blasts percentage in peripheral blood and bone marrow at diagnosis, disease origin (*de novo* vs secondary), age at HSCT, disease status at transplantation (CR vs no CR), number of chemotherapy cycles prior to HSCT, HLA match (antigen match vs mismatch), HLA donor type (related vs unrelated) and sex of donor and recipient (female into male vs all others). Of these, variables significant at  $\alpha=0.20$  in univariate analyses were considered for multivariate analyses (displayed as Forest plots, Supplemental Figure S7). The final model was chosen after forward adjusting for these variables based on the Bayesian information criterion (BIC).

### *EVI1* expression

The quantification of *EVI1* and *18S* expression was performed by RT-qPCR using the Taqman gene expression assays (Applied Biosystems, Carlsbad, CA) Hs00602795\_m1 (*EVI1*), and Hs99999901\_s1 (*18S*) following the manufacturer's protocols. The to *18S* normalized expression of *EVI1* in the cell line SKOV3 was used to define *EVI1* positive expressers, who were defined as patients with an expression higher than 0.1 relative to the *EVI1* expression of SKOV3.<sup>16</sup>

## **Supplemental Results**

### Survival Entire Cohort and Distinct Subgroups

In 234 AML patients receiving HSCT we observed a CIR of 33.3% (95% confidence interval 29.6% – 39.9%), and an OS of 57.3% (95% confidence interval 51.1% – 64.4%) two years after HSCT (Supplemental Figure S1).

Comparable to the entire cohort, the assignment to the three genetic risk groups according to the ELN2017 classification significantly associated with CIR ( $P<0.001$ ) and OS ( $P=0.03$ ; Supplemental Figure S2) in patients receiving HSCT in CR1. Altogether 57 favorable, 22 intermediate, and 58 adverse risk patients received allogeneic HSCT in CR1.

When we analyzed patients receiving allogeneic HSCT in CR without detectable measurable residual disease (MRD), we observed that adverse risk patients still had significantly higher CIR than patients classified as intermediate or favorable ( $P<0.001$ ), however OS only differed by trend between the three genetic risk groups ( $P=0.09$ ; Supplemental Figure S3).

When we analyzed patients  $\geq 60$  years at diagnosis the ELN2017 classification retained its prognostic impact on CIR ( $P<0.001$ ) and OS ( $P=0.03$ ; Supplemental Figure S4) in our cohort of AML patients receiving allogeneic HSCT.

### Outcome Analysis for Patients with Monosomal Karyotype

Presence of a monosomal karyotype was newly introduced in the ELN2017 classification to define AML patients with adverse genetic risk.<sup>14</sup> We observed significantly higher CIR (77.3% vs 48.4% two years after allogeneic HSCT;  $P=0.02$ ) and shorter OS (27.5% vs 56.8% two years after allogeneic HSCT;  $P=0.01$ ) for patients with monosomal karyotype compared to the other adverse risk patients (Supplemental Figure S6).

## References

1. Büchner T, Schlenk RF, Schaich M, et al. Acute Myeloid Leukemia (AML): Different treatment strategies versus a common standard arm--combined prospective analysis by the German AML Intergroup. *Journal of clinical oncology*. 2012;30(29):3604-3610.
2. Stone RM, Mandrekar SJ, Sanford BL, et al. Midostaurin plus Chemotherapy for Acute Myeloid Leukemia with a FLT3 Mutation. *The New England journal of medicine*. 2017;377(5):454-464.
3. Creutzig U, Zimmermann M, Bourquin J-P, et al. Randomized trial comparing liposomal daunorubicin with idarubicin as induction for pediatric acute myeloid leukemia: Results from Study AML-BFM 2004. *Blood*. 2013;122(1):37-43.
4. Niederwieser D, Hoffmann VS, Pfirrmann M, et al. Comparison of Treatment Strategies in Patients over 60 Years with AML: Final Analysis of a Prospective Randomized German AML Intergroup Study. *Blood*. 2016;128(22):1066.
5. Lancet JE, Uy GL, Cortes JE, et al. CPX-351 (cytarabine and daunorubicin) Liposome for Injection Versus Conventional Cytarabine Plus Daunorubicin in Older Patients With Newly Diagnosed Secondary Acute Myeloid Leukemia. *Journal of clinical oncology*. 2018;36(26):2684-2692.
6. Hegenbart U, Niederwieser D, Sandmaier BM, et al. Treatment for acute myelogenous leukemia by low-dose, total-body, irradiation-based conditioning and hematopoietic cell transplantation from related and unrelated donors. *Journal of clinical oncology*. 2006;24(3):444-453.
7. McSweeney PA, Niederwieser D, Shizuru JA, et al. Hematopoietic cell transplantation in older patients with hematologic malignancies: Replacing high-dose cytotoxic therapy with graft-versus-tumor effects. *Blood*. 2001;97(11):3390-3400.
8. Thomas ED, Clift RA, Hersman J, et al. Marrow transplantation for acute nonlymphoblastic leukemia in first remission using fractionated or single-dose irradiation. *International journal of radiation oncology, biology, physics*. 1982;8(5):817-821.



9. Fleischhack G, Hasan C, Graf N, Mann G, Bode U. IDA-FLAG (idarubicin, fludarabine, cytarabine, G-CSF), an effective remission-induction therapy for poor-prognosis AML of childhood prior to allogeneic or autologous bone marrow transplantation: Experiences of a phase II trial. *British journal of haematology*. 1998;102(3):647-655.
10. Schmid C, Schleuning M, Ledderose G, Tischer J, Kolb H-J. Sequential regimen of chemotherapy, reduced-intensity conditioning for allogeneic stem-cell transplantation, and prophylactic donor lymphocyte transfusion in high-risk acute myeloid leukemia and myelodysplastic syndrome. *Journal of clinical oncology*. 2005;23(24):5675-5687.
11. Parker JE, Pagliuca A, Mijovic A, et al. Fludarabine, cytarabine, G-CSF and idarubicin (FLAG-IDA) for the treatment of poor-risk myelodysplastic syndromes and acute myeloid leukaemia. *British journal of haematology*. 1997;99(4):939-944.
12. Niederwieser D, Maris M, Shizuru JA, et al. Low-dose total body irradiation (TBI) and fludarabine followed by hematopoietic cell transplantation (HCT) from HLA-matched or mismatched unrelated donors and postgrafting immunosuppression with cyclosporine and mycophenolate mofetil (MMF) can induce durable complete chimerism and sustained remissions in patients with hematological diseases. *Blood*. 2003;101(4):1620-1629.
13. Glucksberg H, Storb R, Fefer A, et al. Clinical manifestations of graft-versus-host disease in human recipients of marrow from HL-A-matched sibling donors. *Transplantation*. 1974;18(4):295-304.
14. Döhner H, Estey E, Grimwade D, et al. Diagnosis and management of AML in adults: 2017 ELN recommendations from an international expert panel. *Blood*. 2017;129(4):424-447.
15. Scrucca L, Santucci A, Aversa F. Regression modeling of competing risk using R: An in depth guide for clinicians. *Bone marrow transplantation*. 2010;45(9):1388-1395.
16. Gröschel S, Lugthart S, Schlenk RF, et al. High EVI1 expression predicts outcome in younger adult patients with acute myeloid leukemia and is associated with distinct cytogenetic abnormalities. *Journal of clinical oncology*. 2010;28(12):2101-2107.

## Supplemental Tables

| Table S1. Distribution of genetic lesion and allocation to the three ELN2017 genetic risk groups in 234 AML patients undergoing allogeneic hematopoietic stem cell transplantation. |                                                                                      |           |
|-------------------------------------------------------------------------------------------------------------------------------------------------------------------------------------|--------------------------------------------------------------------------------------|-----------|
| ELN2017 risk group                                                                                                                                                                  | Genetic aberration                                                                   | n (%)     |
| favorable                                                                                                                                                                           | t(8;21)(q22;q22.1); <i>RUNX1-RUNX1T1</i>                                             | 13 (14.0) |
|                                                                                                                                                                                     | inv(16)(p13.1q22) or t(16;16)(p13.1;q22); <i>CBFB-MYH11</i>                          | 15 (16.1) |
|                                                                                                                                                                                     | mutated <i>NPM1</i> without <i>FLT3-ITD</i> or with <i>FLT3-ITD</i> <sup>low</sup>   | 62 (66.7) |
|                                                                                                                                                                                     | biallelic mutated <i>CEBPA</i>                                                       | 3 (3.2)   |
| intermediate                                                                                                                                                                        | mutated <i>NPM1</i> and <i>FLT3-ITD</i> <sup>high</sup>                              | 3 (10.0)  |
|                                                                                                                                                                                     | wild-type <i>NPM1</i> without <i>FLT3-ITD</i> or with <i>FLT3-ITD</i> <sup>low</sup> | 14 (46.7) |
|                                                                                                                                                                                     | t(9;11)(p21.3;q23.3); <i>MLLT3-KMT2A</i>                                             | 2 (6.7)   |
|                                                                                                                                                                                     | cytogenetic abnormalities not classified as favorable or adverse                     | 11 (36.7) |
|                                                                                                                                                                                     | trisomy 8                                                                            | 6 (54.5)  |
|                                                                                                                                                                                     | trisomy 11                                                                           | 2 (18.2)  |
| other genetic aberrations                                                                                                                                                           | 3 (27.3)                                                                             |           |
| adverse                                                                                                                                                                             | t(6;9)(p23;q34.1); <i>DEK-NUP214</i>                                                 | 1 (0.4)   |
|                                                                                                                                                                                     | t(v;11q23.3); <i>KMT2A</i> rearranged                                                | 13 (5.6)  |
|                                                                                                                                                                                     | t(9;22)(q34.1;q11.2); <i>BCR-ABL1</i>                                                | 2 (0.9)   |
|                                                                                                                                                                                     | inv(3)(q21.3q26.2) or t(3;3)(q21.3;q26.2); <i>GATA2, MECOM</i>                       | 9 (3.9)   |
|                                                                                                                                                                                     | -5 or del(5q)                                                                        | 32 (13.7) |
|                                                                                                                                                                                     | -7                                                                                   | 34 (14.6) |
|                                                                                                                                                                                     | -17/abn(17p)                                                                         | 8 (3.4)   |
|                                                                                                                                                                                     | complex karyotype                                                                    | 50 (21.5) |
|                                                                                                                                                                                     | monosomal karyotype                                                                  | 33 (14.2) |
|                                                                                                                                                                                     | wild-type <i>NPM1</i> and <i>FLT3-ITD</i> <sup>high</sup>                            | 9 (3.9)   |
|                                                                                                                                                                                     | mutated <i>RUNX1</i>                                                                 | 15 (6.4)  |
|                                                                                                                                                                                     | mutated <i>ASXL1</i>                                                                 | 14 (6.0)  |
|                                                                                                                                                                                     | mutated <i>TP53</i>                                                                  | 13 (5.6)  |

**Table S2.** Clinical characteristics of adverse risk AML patients receiving allogeneic transplantation according to the *TP53* mutational status.

| Characteristics                             | all<br>n=51 | <i>TP53</i> wt<br>n=39 | <i>TP53</i> mut<br>n=12 | <i>P</i> |
|---------------------------------------------|-------------|------------------------|-------------------------|----------|
| Age at diagnosis, years                     |             |                        |                         |          |
| Median                                      | 63.6        | 64.1                   | 62.4                    | 0.66     |
| Range                                       | 46.6 – 74.8 | 49.6 – 74.8            | 46.6 – 74.4             |          |
| Sex, n (%)                                  |             |                        |                         |          |
| Female                                      | 28 (54.9)   | 20 (51.3)              | 8 (66.7)                | 0.51     |
| Male                                        | 23 (45.1)   | 19 (48.7)              | 4 (33.3)                |          |
| WBC at diagnosis, x10 <sup>9</sup> /l       |             |                        |                         |          |
| Median                                      | 4.7         | 4.7                    | 4.1                     | 0.26     |
| Range                                       | 0.7 – 385   | 0.8 – 385              | 0.7 – 47.9              |          |
| Platelets at diagnosis, x10 <sup>9</sup> /l |             |                        |                         |          |
| Median                                      | 63          | 68.5                   | 38                      | 0.21     |
| Range                                       | 3 – 305     | 3 – 305                | 13 – 145                |          |
| Hemoglobin at diagnosis, g/dl               |             |                        |                         |          |
| Median                                      | 9.0         | 9.1                    | 8.5                     | 0.25     |
| Range                                       | 5.6 – 14.9  | 5.6 – 14.9             | 5.8 – 10.0              |          |
| Peripheral blasts at diagnosis, %           |             |                        |                         |          |
| Median                                      | 20          | 23                     | 12.5                    | 0.03     |
| Range                                       | 0 – 97      | 2 – 97                 | 0 – 36                  |          |
| Bone marrow blasts at diagnosis, %          |             |                        |                         |          |
| Median                                      | 44          | 55                     | 24                      | <0.001   |
| Range                                       | 3 – 95      | 24 – 95                | 3 – 50                  |          |
| Complex karyotype, n (%)                    |             |                        |                         |          |
| Absent                                      | 34 (68.0)   | 31 (81.6)              | 3 (25.0)                | <0.001   |
| Present                                     | 16 (32.0)   | 7 (18.4)               | 9 (75.0)                |          |
| Monosomal karyotype, n (%)                  |             |                        |                         |          |
| Absent                                      | 41 (82.0)   | 36 (94.7)              | 5 (41.7)                | <0.001   |
| Present                                     | 9 (18.0)    | 2 (5.3)                | 7 (58.3)                |          |
| Remission status at HSCT, n (%)             |             |                        |                         |          |
| CR                                          | 36 (70.6)   | 28 (71.8)              | 8 (66.7)                | 0.57     |
| CRi                                         | 13 (25.5)   | 10 (25.6)              | 3 (25.0)                |          |
| PR                                          | 2 (3.9)     | 1 (2.6)                | 1 (8.3)                 |          |
| Chemotherapy before HSCT, n (%)             |             |                        |                         |          |
| 1 cycle                                     | 13 (26.5)   | 10 (27.0)              | 3 (25.0)                | 0.69     |
| 2 cycles                                    | 31 (63.3)   | 24 (64.9)              | 7 (58.3)                |          |
| 3 cycles                                    | 5 (10.2)    | 3 (8.1)                | 2 (16.7)                |          |

Abbreviations: ELN2017, 2017 European LeukemiaNet genetic risk classification; WBC, white blood count; HSCT, hematopoietic stem cell transplantation; CR, complete remission; CRi, complete remission with incomplete peripheral recovery; PR, partial response.

<sup>a</sup>*P*-Values are from Fisher's exact or Kruskal-Wallis test and compare *TP53* mutated vs *TP53* wild-type patients.

**Table S3.** Clinical characteristics of AML patients receiving allogeneic transplantation in CR1 according to the ELN2017 genetic risk group.

| Characteristics                               | all<br>n=137 | ELN2017<br>favorable<br>n=57 | ELN2017<br>intermediate<br>n=22 | ELN2017<br>adverse<br>n=58 | <i>P</i> |
|-----------------------------------------------|--------------|------------------------------|---------------------------------|----------------------------|----------|
| Age at diagnosis, years                       |              |                              |                                 |                            |          |
| Median                                        | 59.6         | 53.5                         | 60.8                            | 60.7                       | 0.37     |
| Range                                         | 19.1 – 74.8  | 22.2 – 73.7                  | 19.1 – 72.2                     | 23.3 – 74.8                |          |
| Sex, n (%)                                    |              |                              |                                 |                            |          |
| Female                                        | 65 (47.4)    | 27 (47.4)                    | 9 (40.9)                        | 29 (50.0)                  | 0.78     |
| Male                                          | 72 (52.6)    | 30 (52.6)                    | 13 (59.1)                       | 29 (50.0)                  |          |
| WBC at diagnosis, x10 <sup>9</sup> /l         |              |                              |                                 |                            |          |
| Median                                        | 8.1          | 13.2                         | 2.3                             | 6.3                        | 0.03     |
| Range                                         | 0.7 – 385    | 1.2 – 324                    | 0.7 – 117                       | 0.9 – 385                  |          |
| Platelets at diagnosis, x10 <sup>9</sup> /l   |              |                              |                                 |                            |          |
| Median                                        | 68           | 75                           | 78                              | 62                         | 0.61     |
| Range                                         | 5 – 268      | 7 – 238                      | 10 – 268                        | 5 – 218                    |          |
| Hemoglobin at diagnosis, g/dl                 |              |                              |                                 |                            |          |
| Median                                        | 8.3          | 8.4                          | 9.3                             | 8.0                        | 0.37     |
| Range                                         | 4.5 – 14.7   | 4.5 – 14.7                   | 5.2 – 13.4                      | 5.3 – 13.4                 |          |
| Peripheral blasts at diagnosis, %             |              |                              |                                 |                            |          |
| Median                                        | 21.5         | 29                           | 17                              | 18                         | 0.82     |
| Range                                         | 0 – 97       | 2 – 97                       | 2 – 96                          | 0 – 97                     |          |
| Bone marrow blasts at diagnosis, %            |              |                              |                                 |                            |          |
| Median                                        | 52.2         | 52.5                         | 50                              | 56.5                       | 0.93     |
| Range                                         | 10 – 95      | 20 – 95                      | 21 – 95                         | 10 – 95                    |          |
| <i>DNMT3A</i> mutation at diagnosis, n (%)    |              |                              |                                 |                            |          |
| Absent                                        | 71 (82.6)    | 26 (74.3)                    | 18 (90.0)                       | 27 (87.1)                  | 0.29     |
| Present                                       | 15 (17.4)    | 9 (25.7)                     | 2 (10.0)                        | 4 (12.9)                   |          |
| <i>FLT3</i> -TKD mutation at diagnosis, n (%) |              |                              |                                 |                            |          |
| Absent                                        | 117 (89.3)   | 47 (87.0)                    | 21 (95.5)                       | 49 (89.1)                  | 0.64     |
| Present                                       | 14 (10.7)    | 7 (13.0)                     | 1 (4.5)                         | 6 (10.9)                   |          |
| <i>JAK2</i> mutation at diagnosis, n (%)      |              |                              |                                 |                            |          |
| Absent                                        | 56 (88.9)    | 16 (100.0)                   | 15 (71.4)                       | 25 (96.2)                  | 0.008    |
| Present                                       | 7 (11.1)     | 0 (0.0)                      | 6 (28.6)                        | 1 (3.8)                    |          |
| <i>EVI1</i> expression at diagnosis, n (%)    |              |                              |                                 |                            |          |
| Absent                                        | 63 (81.8)    | 33 (100.0)                   | 9 (64.3)                        | 22 (71.0)                  | <0.001   |
| Present                                       | 14 (18.2)    | 0 (0.0)                      | 5 (35.7)                        | 9 (29.0)                   |          |
| Chemotherapy before HSCT, n (%)               |              |                              |                                 |                            |          |
| 1 cycle                                       | 10 (9.9)     | 2 (5.1)                      | 1 (4.8)                         | 7 (17.1)                   | 0.29     |
| 2 cycles                                      | 70 (69.3)    | 26 (66.7)                    | 16 (76.2)                       | 28 (68.3)                  |          |
| ≥3 cycles                                     | 21 (20.8)    | 11 (28.2)                    | 4 (19.0)                        | 6 (14.6)                   |          |

Abbreviations: ELN2017, 2017 European LeukemiaNet genetic risk classification; WBC, white blood count; HSCT, hematopoietic stem cell transplantation; CR, complete remission; CRi, complete remission with incomplete peripheral recovery; PR, partial remission; *DNMT3A*, DNA methyltransferase 3 alpha; *FLT3*, fms related receptor tyrosine kinase 3; TKD, tyrosine kinase domain; *JAK2*, Janus kinase 2; *EVI1*, ecotropic viral integration site 1.

<sup>a</sup>*P*-Values are from Fisher's exact or Kruskal-Wallis test and compare the three ELN2017 genetic risk groups.

Supplemental Figures

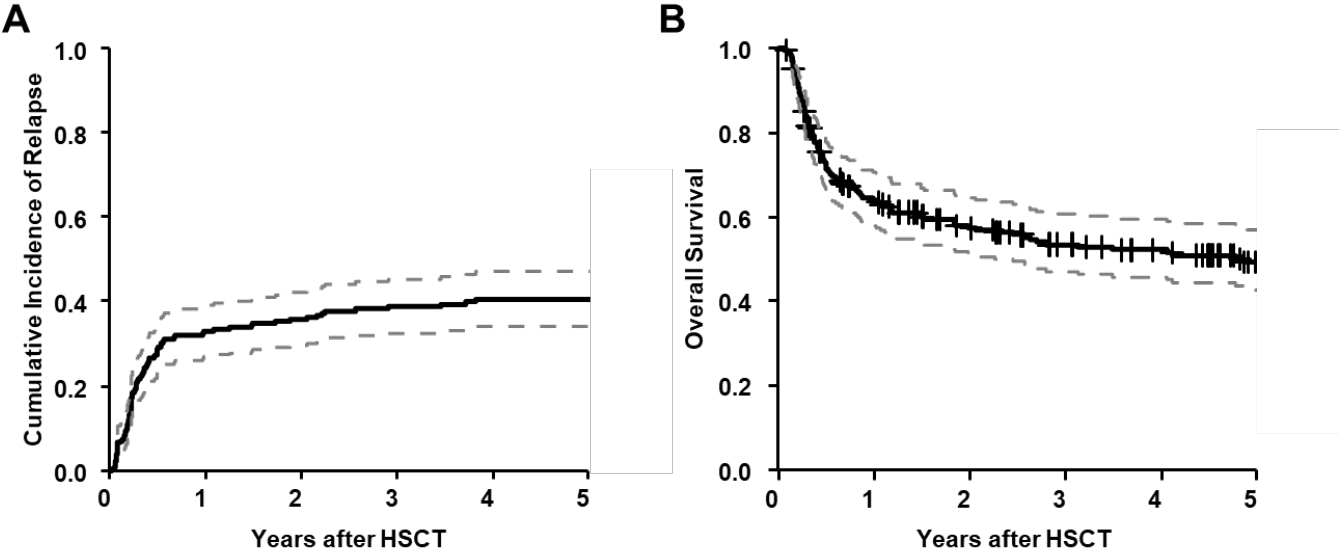

Supplemental Figure S1

Cumulative incidence of relapse (A) and overall survival (B) of the analyzed 234 AML patients receiving allogeneic HSCT.

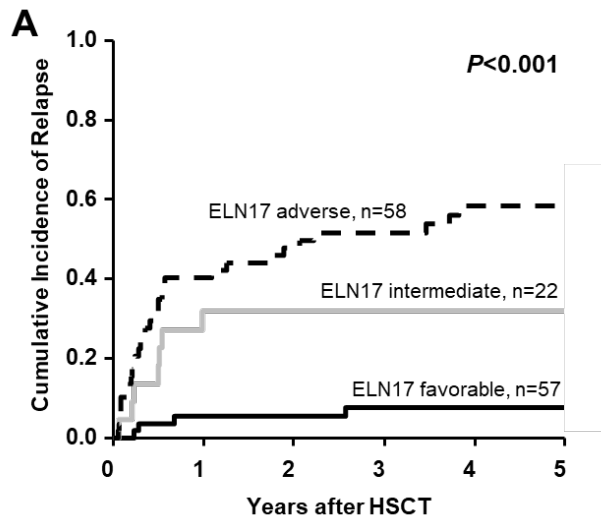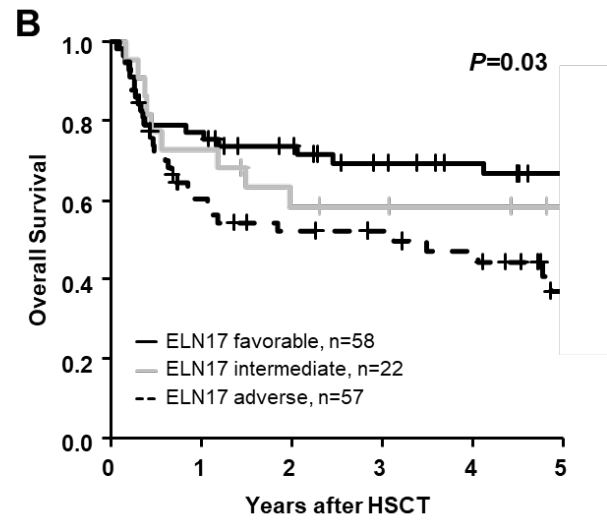

Supplemental Figure S2

Prognostic impact of allocation to the three ELN2017 genetic risk groups in patients receiving allogeneic hematopoietic stem cell transplantation (HSCT) in first complete remission on cumulative incidence of relapse (A) and overall survival (B).

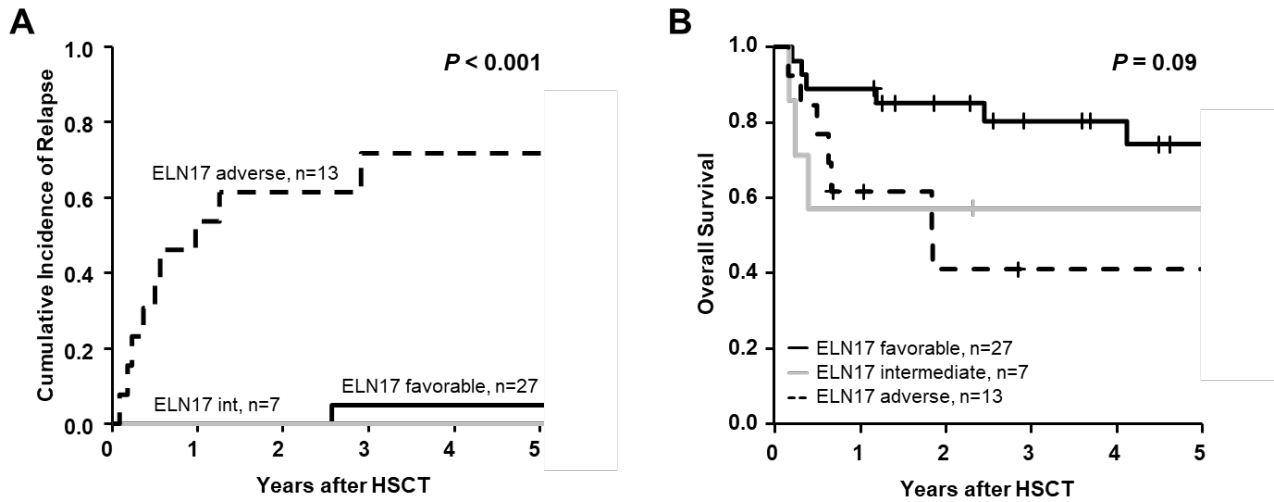

Supplemental Figure S3

The allocation to the three ELN2017 genetic risk groups retained its prognostic impact on cumulative incidence of relapse (A) and overall survival by trend (B) in AML patients receiving allogeneic hematopoietic stem cell transplantation (HSCT) in complete remission without detectable measurable residual disease.

Patients  $\geq 60$  years at diagnosis

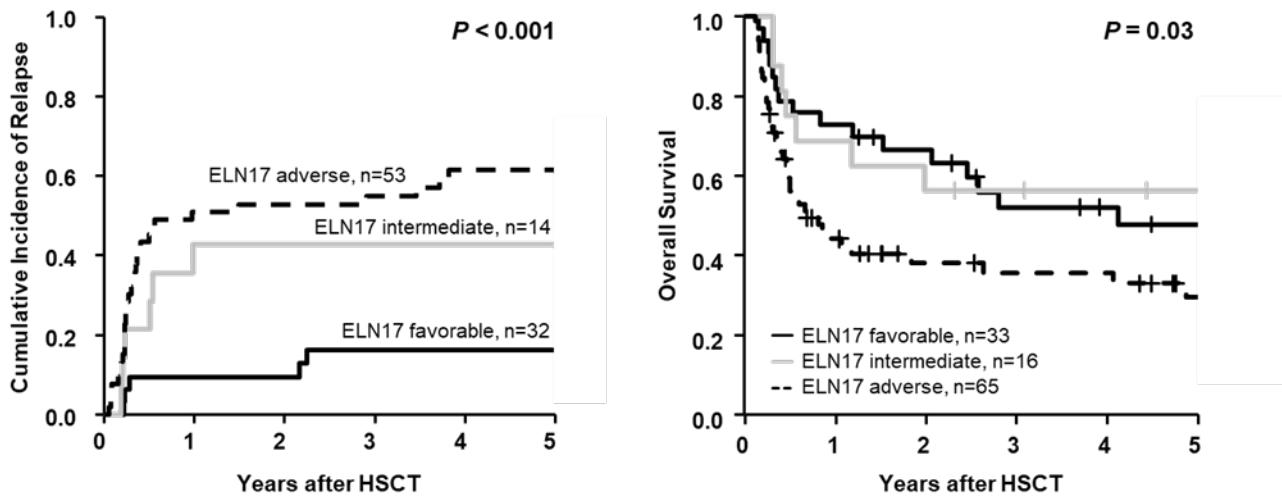

Supplemental Figure S4

The ELN2017 genetic risk classification retained its prognostic impact on cumulative incidence of relapse (A) and overall survival (B) in older AML patients ( $\geq 60$  years at diagnosis) receiving allogeneic hematopoietic stem cell transplantation (HSCT).



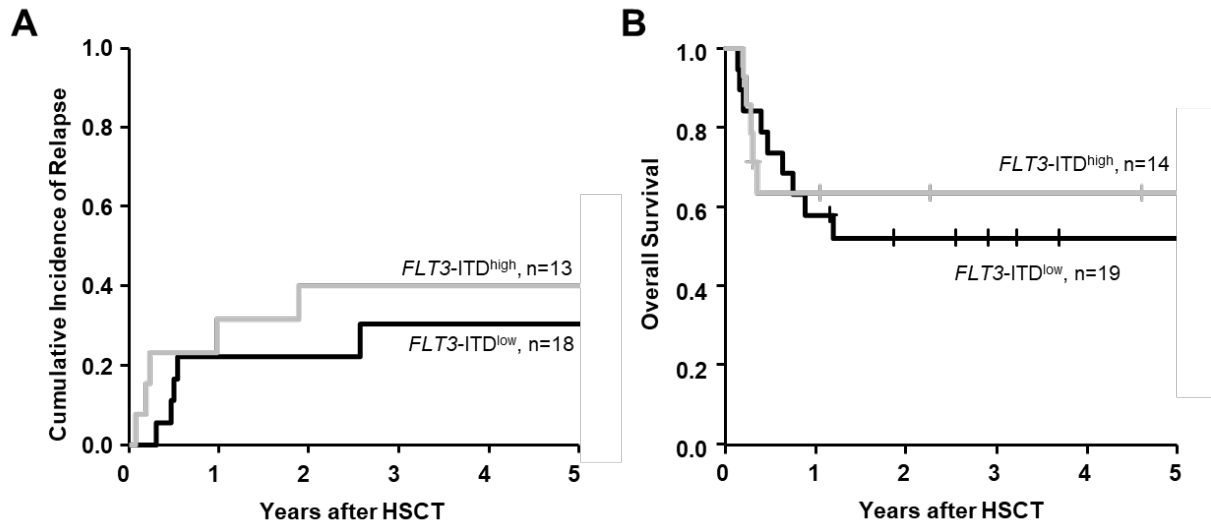

Supplemental Figure S5

Impact of the allelic ratio in AML patients harboring *FLT3* internal tandem duplication (ITD) on cumulative incidence of relapse (A) and overall survival (B). Patients with an *FLT3*-ITD allelic ratio  $\geq 0.5$  were defined as *FLT3*-ITD<sup>high</sup>, while patients with an allelic ratio  $< 0.5$  were labeled *FLT3*-ITD<sup>low</sup>. All patients received an allogeneic hematopoietic stem cell transplantation (HSCT).

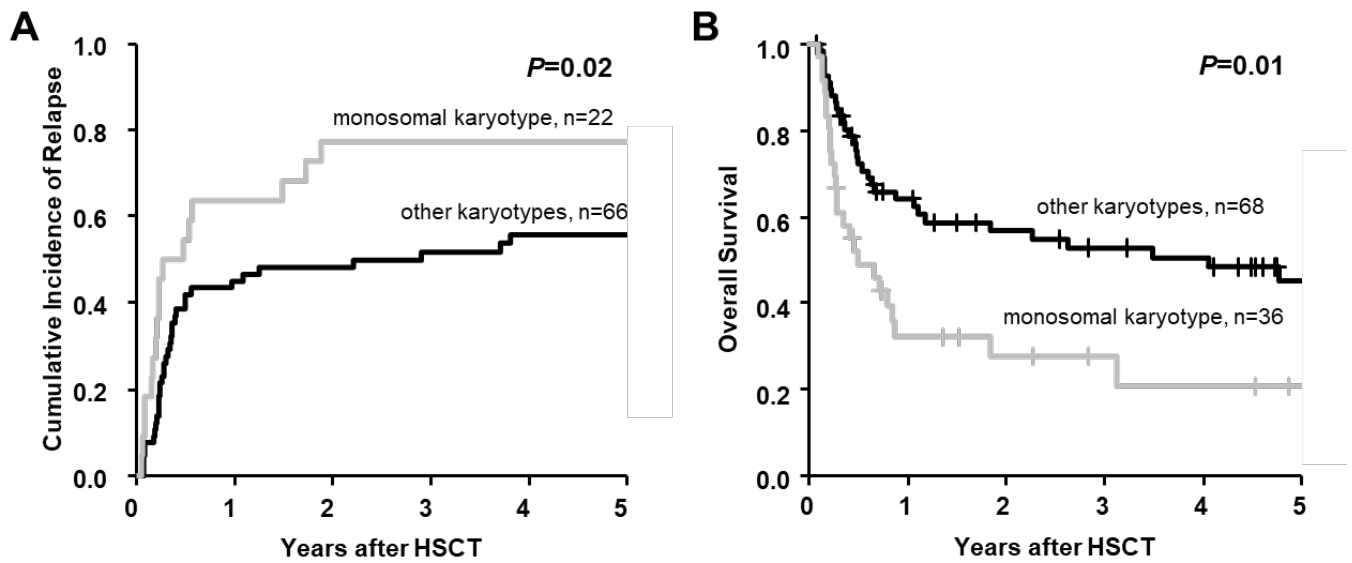

Supplemental Figure S6

Prognostic impact of presence of a monosomal karyotype in AML patients assigned to the ELN2017 adverse risk group on cumulative incidence of relapse (A) and overall survival (B). All patients received an allogeneic hematopoietic stem cell transplantation (HSCT).

**A**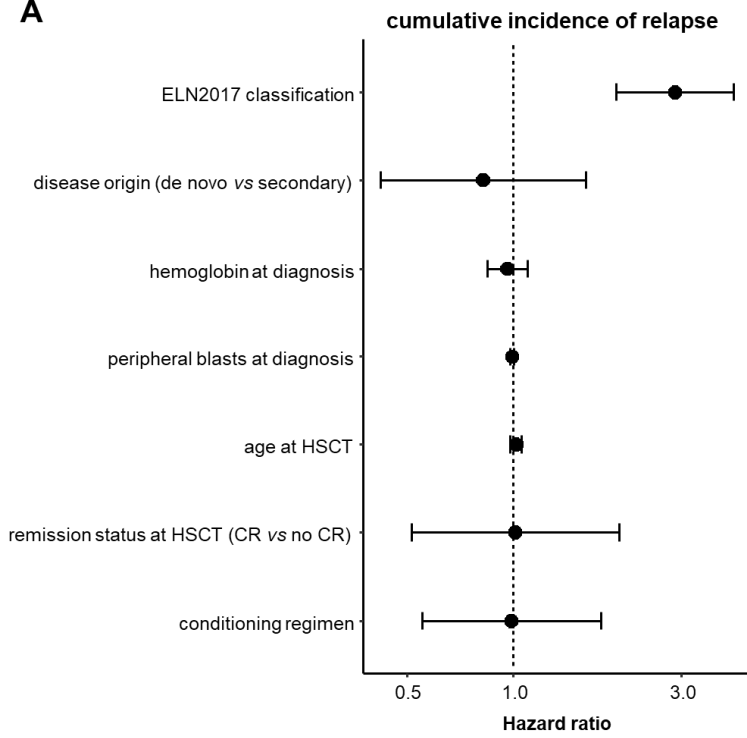**B**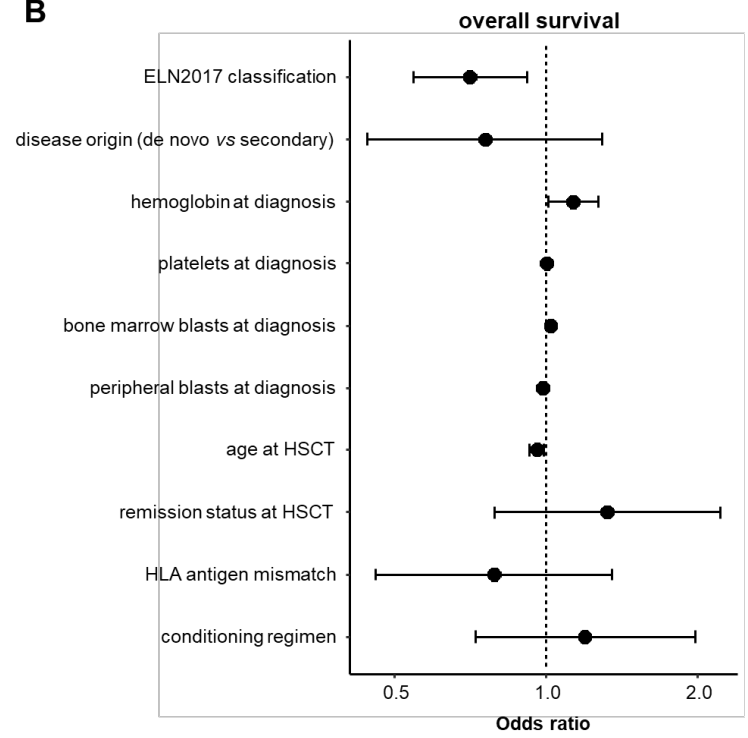

Supplemental Figure S7

All variables considered for multivariate analysis of cumulative incidence of relapse (A) and overall survival (B) based on  $\alpha \leq 0.20$  in univariate analyses.
